# Supplementary material
Source: Springer Nature journal article supplement (https://www.springermedizin.de/resource/supplementary/12913_2011_2331_MOESM1_ESM.pdf/9530380)

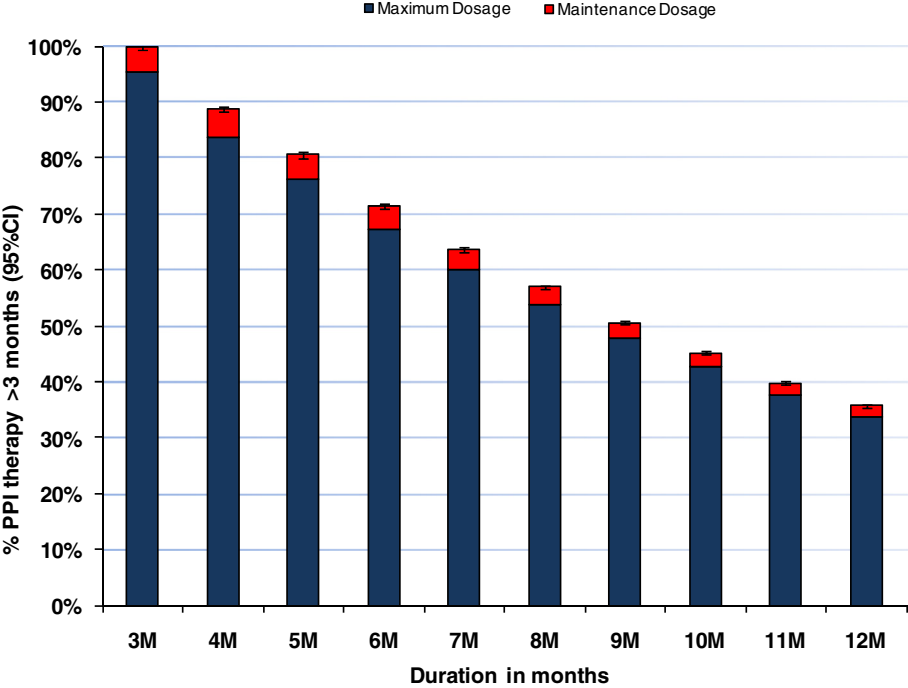

Supplement: MOESM1 [file 9530380]
